# Supplementary material for: A G-Quadruplex-Binding Small Molecule and the HDAC Inhibitor SAHA (Vorinostat) Act Synergistically in Gemcitabine-Sensitive and Resistant Pancreatic Cancer Cells
Source: MDPI journal article supplement (doi:10.3390/molecules25225407), 2020-11-19

Supplementary Data

**A G-quadruplex-binding small molecule and the  
HDAC inhibitor SAHA (Vorinostat) act  
synergistically in gemcitabine sensitive and  
resistant pancreatic cancer cells <sup>†</sup>**

Ahmed Abdullah Ahmed and Stephen Neidle

**Supplementary Figure. Synergistic effect between CM03 and the HDAC inhibitors panobinostat and romidepsin in MIA PaCa-2 cells.**

**(a,d)** Combination index (CI) values for the two drug combinations a) CM03 + panobinostat and d) CM03 + romidepsin, CI < 1 indicates synergism (green), CI = 1 additive effect (yellow) and CI > 1 antagonism (red).

**(b,e)** Fraction affected (Fa) by different combinations of drug concentrations using the SRB cytotoxicity assay.

**(c,f)** Dose-response curves for HDAC inhibitor alone and in combination with CM03. Data represents the mean  $\pm$  SEM of at least three independent experiments.

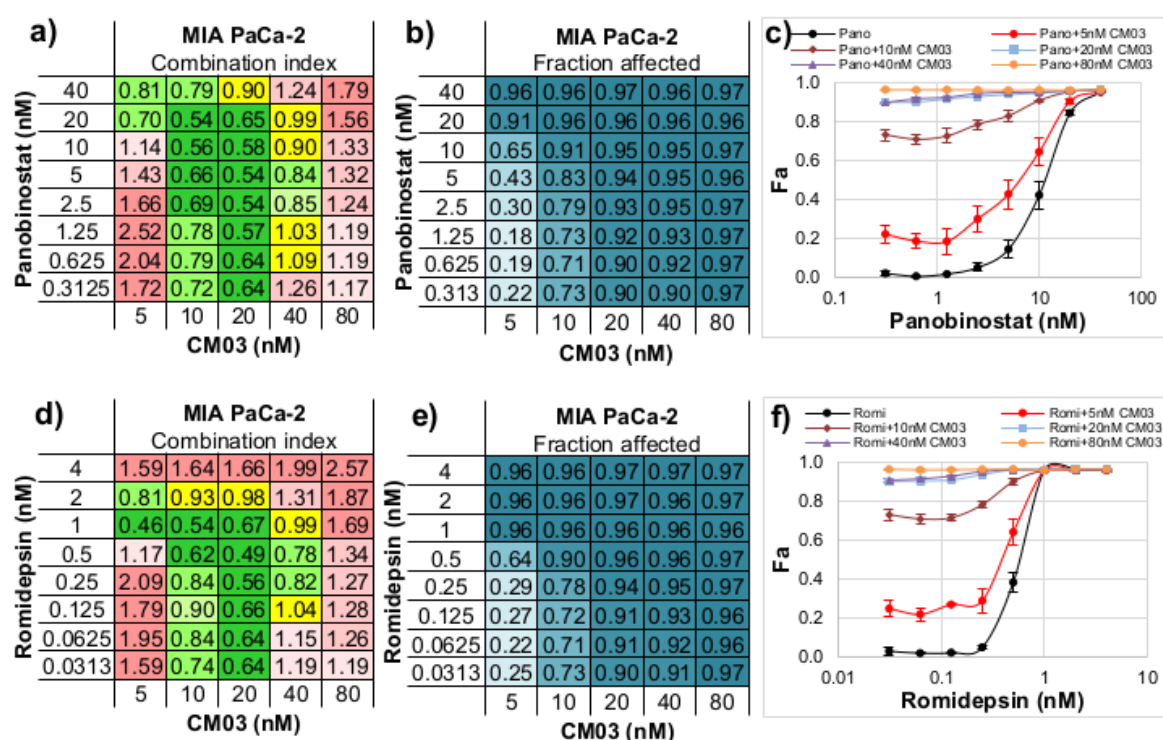

Supplement: s1 [file s1]
